# Supplementary material
Source: ML conference proceedings conference paper supplement (https://www.ecva.net/papers/eccv_2022/papers_ECCV/html/136710416_ECCV_2022_paper.php)
Supplement: Supplementary file 1 [file 136710416-supp.pdf]

# Weight Fixing Networks - Additional Information

Christopher Subia-Waud & Srinandan Dasmahapatra

University of Southampton, Southampton, SO17 1BJ  
 {cc2u18, sd}@soton.ac.uk

## 1 Details of the Powers-of-two Approximation Algorithm

We map our proposal set  $C^S$  to a  $\omega$ -order approximation where each of the clusters  $c_k \in C^S$  are written as  $\omega$  powers-of-two (Eq 1). We do so using Algorithm 1. Figure 1 demonstrates how the values of  $C^S$  are rounded given different orders.

$$c_k = \sum_{j=1}^{\omega} r_j, \quad r_j \in \left\{ -\frac{1}{2^b}, \dots, -\frac{1}{2^{j+1}}, -\frac{1}{2^j}, 0, \frac{1}{2^j}, \frac{1}{2^{j+1}}, \dots, \frac{1}{2^b} \right\} \quad (1)$$

---

### Algorithm 1: Determining possible clusters

---

**Input:** The full precision proposal set:  $C^S$ , allowable relative distance:  $\delta$ ,  
 pow2 rounding function:  $round(x) = sgn(x)2^{\lfloor \log_2(x) \rfloor}$

**Output:** An order  $\omega$  precision cluster set:  $\tilde{C}^\omega$

```

 $\tilde{C}^\omega \leftarrow []$ 
for  $c_k \in C^S$  do
   $c'_k = round(c_k)$ 
  for  $i = 0 \rightarrow \omega$  do
     $\delta_{c_k} \leftarrow c_k - c'_k$ 
    if  $|\delta_{c_k}| \geq \delta c_k$  then
       $c'_k \leftarrow c'_k + round(\delta_{c_k})$ 
    end
  end
   $\tilde{C}^\omega \leftarrow \tilde{C}^\omega \cup \{c'_k\}$ 
end

```

---

## 2 Experiment Details

We give a full breakdown of the parameters used across all experiments ran in Table 1.

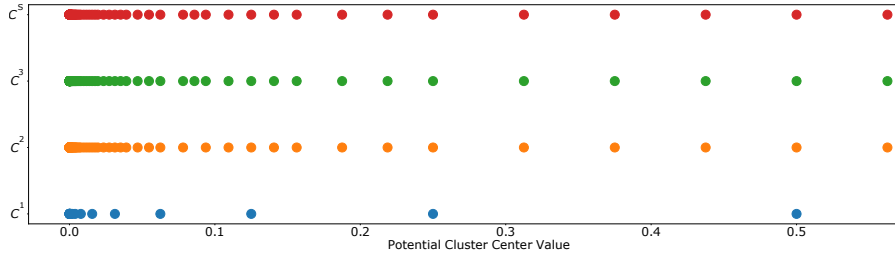

Fig. 1. Approximating clusters in  $C^S$  with different orders

| Model     | Data     | Opt  | LR   | T  | Batch size | $\gamma$                                    | $\alpha$                  |
|-----------|----------|------|------|----|------------|---------------------------------------------|---------------------------|
| ResNet-18 | ImageNet | Adam | 2e-4 | 10 | 128        | {0.05, 0.025, , 0.015, 0.01, 0.0075, 0.005} | {0.2, 0.4}                |
| ResNet-34 | ImageNet | Adam | 2e-4 | 10 | 64         | {0.05, 0.025, , 0.015, 0.01, 0.0075, 0.005} | {0.4}                     |
| ResNet-50 | ImageNet | Adam | 2e-4 | 10 | 64         | {0.05, 0.025, , 0.015, 0.01, 0.0075, 0.005} | {0.4}                     |
| GoogLeNet | ImageNet | Adam | 2e-4 | 10 | 64         | {0.01, 0.0075, 0.015}                       | {0.4}                     |
| ResNet-18 | CIFAR-10 | Adam | 3e-4 | 10 | 512        | {0.01, 0.02, 0.03, 0.04, 0.05}              | {0.0, 0.1, 0.2, 0.4, 0.8} |
| MobileNet | CIFAR-10 | Adam | 2e-4 | 10 | 512        | {0.01, 0.02, 0.03, 0.04, 0.05}              | {0.0, 0.1, 0.2, 0.4, 0.8} |

Table 1. Full set of hyper-parameters explored for each model-dataset combination.

### 3 Additional Analysis

#### 3.1 Layerwise Breakdown

In Figure 2 we examine how the parameter count and layer-parameter entropy change with each layer for both the WFN and APoT approaches. We find both gains over the unquantised layers of APoT, but also that the entropy and parameter count in the convolutional layers (those quantised by APoT) are similar.

#### 3.2 A Full Metric Comparison

In Table 2 we give the full metric breakdown comparing WFN to the state-of-the-art APoT work. We calculate the unique parameter count and entropy values for subsets of the weights. No BN corresponds to all weights other than those in the batch-norm layers, and No BN-FL is the set of weights not including the first-last and batch-norm layers. It’s clear here that WFN outperforms APoT even when we discount the advantage gained of taking on the challenge of quantising all layers.

#### 3.3 Pruning Experiments

To explore how WFN interacts with pruning we conduct a simple set of experiments. Instead of starting the WFN process with all weights un-fixed we randomly select  $p\%$  of the weights to be pruned in each layer. We then run WFN as before starting with  $p_t = p$ , reducing the number of  $T$  iterations. The results, shown in Figure 3, are conducted with a ResNet-18 and Cifar-10 combination, painting a mixed picture. On the one hand, WFN and pruning at lower

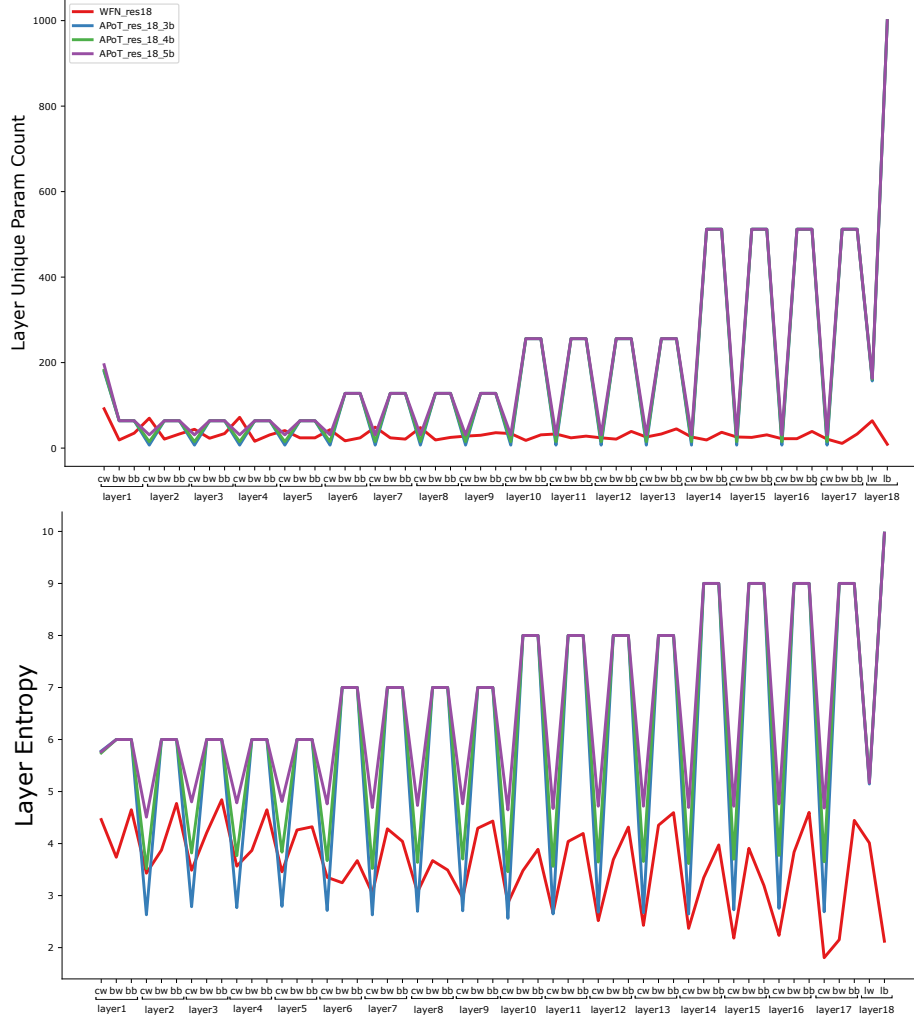

**Fig. 2.** We compare WFN with a traditional quantisation set-up (APoT) with varying bit-widths applied to a ResNet18 model trained on the ImageNet dataset. The top chart shows the layerwise unique parameter count where WFN has consistently fewer unique parameters per layer.

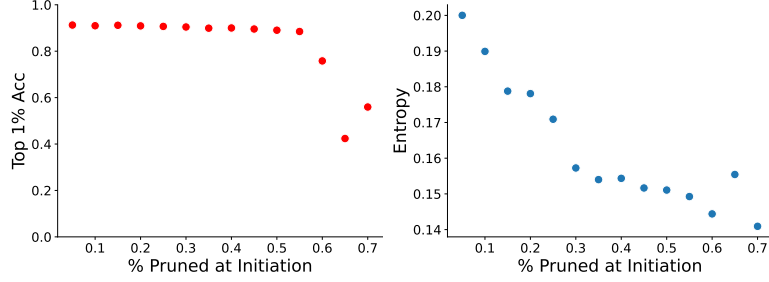

**Fig. 3.** Here we show that unstructured pruning at initialisation up to 50% can be coupled with the WFN process without degradation of performance and can further reduce the weight-space entropy.

| Model     | Method                | Full Network |         |             | No BN   |             | No BN-FL |             |
|-----------|-----------------------|--------------|---------|-------------|---------|-------------|----------|-------------|
|           |                       | Top-1        | Entropy | Param Count | Entropy | Param Count | Entropy  | Param Count |
| ResNet-18 | Baseline              | 68.9         | 23.3    | 10756029    | 23.3    | 10748288    | 23.3     | 10276369    |
|           | APoT (3bit)           | 69.9         | 5.77    | 9237        | 5.76    | 1430        | 5.47     | 274         |
|           | WFN $\delta = 0.015$  | 67.3         | 2.72    | 90          | 2.71    | 81          | 2.5      | 81          |
|           | WFN $\delta = 0.01$   | 69.7         | 3.01    | 164         | 3.00    | 153         | 2.75     | 142         |
|           | WFN $\delta = 0.0075$ | 70.3         | 4.15    | 193         | 4.13    | 176         | 3.98     | 162         |
| ResNet-34 | Baseline              | 73.3         | 24.1    | 19014310    | 24.1    | 18999320    | 24.10    | 18551634    |
|           | APoT (3bit)           | 73.4         | 6.77    | 16748       | 6.75    | 16474       | 6.62     | 389         |
|           | WFN $\delta = 0.015$  | 72.2         | 2.83    | 117         | 2.81    | 100         | 2.68     | 100         |
|           | WFN $\delta = 0.01$   | 72.6         | 3.48    | 164         | 3.47    | 132         | 3.35     | 130         |
|           | WFN $\delta = 0.0075$ | 73.0         | 3.87    | 233         | 3.85    | 191         | 3.74     | 187         |
| ResNet-50 | Baseline              | 76.1         | 24.2    | 19915744    | 24.2    | 19872598    | 24.20    | 18255490    |
|           | WFN $\delta = 0.015$  | 75.1         | 3.55    | 125         | 3.50    | 105         | 3.42     | 102         |
|           | WFN $\delta = 0.01$   | 75.4         | 4.00    | 199         | 3.97    | 169         | 3.88     | 163         |
|           | WFN $\delta = 0.0075$ | 76.0         | 4.11    | 261         | 4.09    | 223         | 4.00     | 217         |

**Table 2.** A full metric comparison of WFN Vs. APoT. We compare the unique parameter count and entropy of all parameters in the full network, as well as the same measures but not including the batch-norm layers (No BN) and the parameters not including the batch-norm and first and last layers (No BN-FL).

levels ( $< 50\%$ ) is well tolerated and provide two benefits, a lower weight-space entropy and few weight-fixing iterations. On the other hand, full-precision networks can tolerate much higher ranges of pruning so there it would seem that a certain amount of synergy between the two approaches is present but this is tempered compared to full precision networks.

It’s important to note that WFN already has a form of pruning built-in with the  $\delta_0$  value balancing the emphasis on pruning over quantisation.
